# Supplementary material for: Students’ Views Towards SARS-CoV-2 Mass Asymptomatic Testing, Social Distancing and Self-Isolation in a University Setting during the COVID-19 Pandemic: A Qualitative Study
Source: Preprints.org preprint supplement (doi:10.20944/preprints202101.0399.v1), 2021-01-20
Supplement: Supplementary file 1 [file supplementary]

**Supplementary File 4.** Thematic map illustrating the relationships between the key themes and subthemes
